# Supplementary material for: Untranslated Regions of a Segmented Kindia Tick Virus Genome Are Highly Conserved and Contain Multiple Regulatory Elements for Viral Replication
Source: MDPI journal article supplement (doi:10.3390/microorganisms12020239), 2024-01-23
Supplement: s1 [file s1]

## Supplementary Material

**Table S1.** Oligonucleotides used for KITV PCR.

| Primer           | Sequence                       | T°C  |
|------------------|--------------------------------|------|
| <i>Segment 1</i> |                                |      |
| S1-1F            | GCCCTTGACTGCAAGTGCAAA          | 57,6 |
| S1-1R            | TATCTACGTGCCAGGGCTTGAC         | 55,7 |
| S1-2F            | TGAAGAACGTCAAGCCCTGG           | 59,8 |
| S1-2R            | GCTGACCCACGAACCTGTTT           | 60,5 |
| S1-3F            | AAAAGAAGGGCTCTGAGGGC           | 59,5 |
| S1-3R            | CTTATACAGGCCCTGTCCCG           | 59,2 |
| S1-4F            | GAAGTGCGGATGGAGCGTAG           | 60,5 |
| S1-4R            | ACCTGTGGGAGCAGAAGGAT           | 60,1 |
| S1-5F            | CATAGTGGACGTGAAAGAAATATCC      | 57,4 |
| S1-5R            | TTTTACTTTTTCCCCAATTCAGTTT      | 57,9 |
| <i>Segment 2</i> |                                |      |
| S2-1F            | GCCGGTGGCAAGTGGCATAACATC       | 61,2 |
| S2-1R            | GACCACTGCCTGGACCTTCTCTGC       | 62,0 |
| S2-2F            | GAACAAAAAAAAATAGAGAAAGAACTGCTA | 57,9 |
| S2-2R            | GGAAGGTTGTGTTCATGTGC           | 57,6 |
| S2-3F            | CGAGGACGCGAAATATGCC            | 58,7 |
| S2-3R            | CTCTGATGGTGAGCCTATGC           | 57,4 |
| S2-4F            | AACTTTGGGAGTGACCAGGG           | 59,1 |
| S2-4R            | GATAAGGCCGTCAGAGCGAG           | 59,9 |
| S2-5F            | CAGGGACGAGACATTGCCAA           | 59,9 |
| S2-5R            | CCGTGGAGTAGTGGACCGTA           | 60,3 |
| S2-6F            | ACCCACCATTCTCACTCGCA           | 61,0 |
| S2-6R            | GGGGCTTTAGCACTTGCCA            | 60,2 |
| S2-7F            | TCTATCTTATGCTATGACGCCCCG       | 55,7 |
| S2-7R            | CCCTTCCGGATCCTCCTAGCTCA        | 60,1 |
| <i>Segment 3</i> |                                |      |
| S3-1F            | GCTGAGACTGCAAGTGCACA           | 60,7 |
| S3-1R            | CGGTCCGATGTGCTCAAAGA           | 60,0 |
| S3-2F            | AATTGGAGAGGCAGAGGGGA           | 59,8 |

|                  |                         |      |
|------------------|-------------------------|------|
| S3-2R            | GACCTTGTGGACCAGGTCA     | 59,1 |
| S3-3F            | GGCAACTCATGACCTGGTCC    | 60,3 |
| S3-3R            | AGGACCACTGTGGCGTAGT     | 60,1 |
| S3-4F            | GCTAAACAGATCAGGCAGCTCA  | 60,2 |
| S3-4R            | TGCTCACGGCTTCTTCTTCC    | 59,9 |
| S3-5F            | GCGATGTATAACGTTGAAGGCG  | 59,9 |
| S3-5R            | TCGGTCGCTTCAACTACAGACT  | 61,0 |
| <i>Segment 4</i> |                         |      |
| S4-1F            | CTCTGAGTTGCAAGTGCTATAGC | 59,0 |
| S4-1R            | TTTCCGGGTATAGTCTTGGTAGC | 59,2 |
| S4-2F            | CGTGTATGCGGCTACCAAGA    | 59,8 |
| S4-2R            | GAATCCAGTGGTACGTCCCG    | 59,8 |
| S4-3F            | CCCTACCAGGCCTGATACGA    | 60,0 |
| S4-3R            | TAGTAGCGGGCCAGGTTGTA    | 59,9 |
| S4-4F            | GCGGAGAGAGAGAAAACGCA    | 60,0 |
| S4-4R            | ACAGGTTACGAACACAGCC     | 60,4 |
| S4-5F            | GGCAACAATAGTGGGAATCGC   | 59,5 |
| S4-5R            | TCCGGAGTATGGAACGAGATCA  | 60,0 |

**Table S2.** Amino acid substitutions between isolates KITV/2018/1, KITV/2018/2 and KITV/2017/1. Amino acid substitutions relative to KITV/2018/1 and KITV/2018/2 are highlighted in blue.

| Amino acid position | Region          | Isolate KITV/2018/1 | Isolate KITV/2018/2 | Isolate KITV/2017/1 |
|---------------------|-----------------|---------------------|---------------------|---------------------|
| 135                 | Segment 1 (NS5) | Val                 | Ile                 | Val                 |
| 217                 |                 | Ala                 | Val                 | Ala                 |
| 233                 |                 | Lys                 | Arg                 | Lys                 |
| 277                 |                 | Arg                 | Arg                 | Ser                 |
| 610                 |                 | His                 | His                 | Arg                 |
| 674                 |                 | Ala                 | Thr                 | Ala                 |
| 747                 |                 | Cys                 | Cys                 | Tyr                 |
| 908                 |                 | Gln                 | Arg                 | Gln                 |
| 76                  | Segment 2 (VP1) | Phe                 | Phe                 | Ser                 |
| 89                  |                 | His                 | His                 | Pro                 |
| 103                 |                 | Gln                 | Gln                 | His                 |
| 160                 |                 | Phe                 | Phe                 | Leu                 |
| 247                 |                 | Val                 | Val                 | Gly                 |
| 368                 |                 | Ile                 | Val                 | Ile                 |

|     |                 |     |     |     |
|-----|-----------------|-----|-----|-----|
| 380 |                 | Thr | Thr | Ala |
| 435 |                 | Glu | Glu | Lys |
| 465 |                 | Gly | Gly | Ser |
| 604 |                 | Val | Val | Ala |
| 622 |                 | Ala | Thr | Ala |
| 236 | Segment 3 (NS3) | Val | Val | Ala |
| 247 |                 | Val | Val | Ala |
| 291 |                 | Ile | Val | Val |
| 379 |                 | Val | Val | Ala |
| 459 |                 | Lys | Lys | Asn |
| 474 |                 | Arg | Arg | Ser |
| 476 |                 | Ser | Phe | Ser |
| 604 |                 | Gly | Gly | Arg |
| 625 |                 | Lys | Arg | Lys |
| 673 |                 | Glu | Gln | Glu |
| 146 | Segment 4 (VP2) | Ser | Ser | Asn |
| 6   | Segment 4 (VP3) | Asp | Asp | Val |
| 18  |                 | Met | Met | Ile |
| 79  |                 | Asn | Ser | Asn |
| 208 |                 | Lys | Arg | Lys |
| 338 |                 | Val | Val | Gly |
| 353 |                 | Phe | Phe | Leu |

**Table S3.** Location of putative UAG binding sites for MS11 protein in the 3' UTRs of KITV and MGTV. Red color – conserved site between Y-3 and Y-2 structures; yellow color – conserved site in the stem of the Y-2 structure; green color - conserved site in the stem of the Y-1 structure.

| The name of the KITV and MGTV isolate, the place of isolation | Coordinates of the location of sites |               |                      |           |
|---------------------------------------------------------------|--------------------------------------|---------------|----------------------|-----------|
|                                                               | Segment 1                            | Segment 2     | Segment 3*           | Segment 4 |
| KITV/2017/1, Guinea, Africa                                   | 43, 48, 80                           | 202, 373      | 12, 43, 94, 104, 138 | 51, 123   |
| KITV/2018/1, Guinea, Africa                                   |                                      | 167, 268, 338 | 12, 43, 94, 104, 138 |           |
| KITV/2018/2, Guinea, Africa                                   |                                      | 167, 268, 338 | 43, 94, 104, 138     |           |
| MGTV Yunnan2016, China, Asia                                  |                                      | 168, 261      | 94, 104, 138         |           |

Note: \*- results for this region are not discussed in this work, since the region is undersequenced.





|           |         |                                                           |                            |                           |                                  |                                  |                                  |                                  |                                  |                                  |                                  |                                  |                                  |                                  |                                  |                                  |                                  |                                  |                                  |
|-----------|---------|-----------------------------------------------------------|----------------------------|---------------------------|----------------------------------|----------------------------------|----------------------------------|----------------------------------|----------------------------------|----------------------------------|----------------------------------|----------------------------------|----------------------------------|----------------------------------|----------------------------------|----------------------------------|----------------------------------|----------------------------------|----------------------------------|
| Segment 4 | 61      | C                                                         | A                          | A                         | A                                | A                                | A                                | A                                | A                                | A                                | A                                | A                                | A                                | A                                | A                                | A                                | A                                | A                                | A                                |
|           | 62      | G                                                         | T                          | T                         | T                                | T                                | T                                | T                                | T                                | T                                | T                                | T                                | T                                | T                                | T                                | T                                | T                                | T                                | T                                |
|           | 144     | -                                                         | -                          | -                         | A                                | A                                | A                                | A                                | A                                | A                                | A                                | A                                | A                                | A                                | A                                | A                                | A                                | A                                | A                                |
|           | 145-178 | -----<br>TGGAACATAAAAAGTCTGTAGTTGAAGCGACC<br>GAA<br>----- |                            |                           | TGGAACATAAAAAGTCTGTAGTTGAAGCGACC |
|           |         | MK673136.1<br>KITV/2017/1                                 | MW341209.11<br>KITV/2018/1 | MW341213.1<br>KITV/2018/2 | OP612458.1                       | OP612457.1                       | OP612456.1                       | OP612455.1                       | OP612454.1                       | OP612453.1                       | OP612452.1                       | OP612451.1                       | OP612450.1                       | OP612449.1                       | OP612448.1                       | OP612447.1                       | OP612446.1                       | OP612445.1                       | OP612444.1                       |
|           |         | 5'UTR                                                     |                            |                           |                                  |                                  |                                  |                                  |                                  |                                  |                                  |                                  |                                  |                                  |                                  |                                  |                                  |                                  |                                  |
|           | 35      | T                                                         | T                          | T                         | C                                | T                                | T                                | C                                | C                                | T                                | T                                | T                                | T                                | T                                | T                                | C                                | C                                | C                                | C                                |
|           | 89      | C                                                         | C                          | T                         | C                                | C                                | C                                | C                                | C                                | C                                | C                                | C                                | C                                | C                                | C                                | C                                | C                                | C                                | C                                |
|           |         | 3'UTR                                                     |                            |                           |                                  |                                  |                                  |                                  |                                  |                                  |                                  |                                  |                                  |                                  |                                  |                                  |                                  |                                  |                                  |
|           | 14      | C                                                         | C                          | C                         | T                                | T                                | T                                | T                                | T                                | T                                | T                                | T                                | T                                | T                                | T                                | T                                | T                                | T                                | T                                |
|           | 245-247 | ---                                                       | GGA                        | GGA                       | GGA                              | GGA                              | GGA                              | GGA                              | GGA                              | GGA                              | GGA                              | GGA                              | GGA                              | GGA                              | GGA                              | GGA                              | GGA                              | GGA                              | GGA                              |

**Table S5.** Conserved regions in 5' UTR of the KITV Segment 1.

| Name of the virus<br>(number of strains) | Motifs<br>1, 2, 4 | Motif<br>1   | Motif<br>2 | Motif<br>4 | Motifs<br>1, 2 | Motifs<br>1, 4 | Motifs<br>2, 4 | Motifs<br>characteristic<br>of KITV were<br>not found |
|------------------------------------------|-------------------|--------------|------------|------------|----------------|----------------|----------------|-------------------------------------------------------|
| KITV (18)                                | 18<br>(100%)      | 0            | 0          | 0          | 0              | 0              | 0              | 0                                                     |
| JMTV (54)                                | 32<br>(59,26%)    | 2<br>(3,70%) | 0          | 0          | 5<br>(9,26%)   | 13<br>(24,07%) | 0              | 2<br>(3,70%)                                          |
| MGTV (3)                                 | 3<br>(100%)       | 0            | 0          | 0          | 0              | 0              | 0              | 0                                                     |

|                         |   |   |              |               |   |   |               |              |
|-------------------------|---|---|--------------|---------------|---|---|---------------|--------------|
| Alongshan virus (8)     | 0 | 0 | 5<br>(62,5%) | 0             | 0 | 0 | 0             | 3<br>(37,5%) |
| Yanggou virus (6)       | 0 | 0 | 0            | 2<br>(33,33%) | 0 | 0 | 4<br>(66,67%) | 0            |
| Takachi virus (5)       | 0 | 0 | 0            | 0             | 0 | 0 | 0             | 5<br>(100%)  |
| Harz mountain virus (7) | 0 | 0 | 7<br>(100%)  | 0             | 0 | 0 | 0             | 0            |

**Table S6.** Conserved regions in 3' UTR of the KITV Segment 1.

| Name of the virus (number of strains) | Motifs<br>1, 3 | Motif<br>1   | Motifs characteristic of KITV<br>were not found |
|---------------------------------------|----------------|--------------|-------------------------------------------------|
| KITV (18)                             | 18<br>(100%)   | 0            | 0                                               |
| JMTV (79)                             | 74<br>(93,67%) | 4<br>(5,1%)  | 1<br>(1,27%)                                    |
| MGTV (3)                              | 3<br>(100%)    | 0            | 0                                               |
| Alongshan virus (10)                  | 0              | 10<br>(100%) | 0                                               |
| Yanggou virus (6)                     | 0              | 6<br>(100%)  | 0                                               |
| Takachi virus (5)                     | 0              | 5<br>(100%)  | 0                                               |
| Harz mountain virus (7)               | 0              | 7<br>(100%)  | 0                                               |

**Table S7.** Conserved regions in 5' UTR of the KITV Segment 2.

| Name of the virus<br>(number of strains) | Motifs<br>1, 2, 3, 4 | Motifs<br>1, 2, 3 | Motifs<br>1, 2 | Motif<br>4 | Motifs<br>2, 4 | Motifs<br>1, 2, 4 | Motifs<br>characteristic<br>of KITV were<br>not found |
|------------------------------------------|----------------------|-------------------|----------------|------------|----------------|-------------------|-------------------------------------------------------|
| KITV (18)                                | 1<br>(5,56%)         | 2<br>(11,11%)     | 15<br>(83,33%) | 0          | 0              | 0                 | 0                                                     |
| JMTV (81)                                | 35<br>(43,21%)       | 1<br>(1,23%)      | 0              | 0          | 30<br>(37,04%) | 14<br>(17,28%)    | 1<br>(1,23%)                                          |

|                            |               |               |               |               |   |   |               |
|----------------------------|---------------|---------------|---------------|---------------|---|---|---------------|
| MGTV (3)                   | 1<br>(33,33%) | 0             | 0             | 0             | 0 | 0 | 2<br>(66,67%) |
| Alongshan virus (7)        | 0             | 0             | 0             | 1<br>(14,29%) | 0 | 0 | 6<br>(85,71%) |
| Yanggou virus (3)          | 0             | 0             | 0             | 0             | 0 | 0 | 3<br>(100%)   |
| Sichuan tick virus (3)     | 0             | 2<br>(66,67%) | 1<br>(33,33%) | 0             | 0 | 0 | 0             |
| Harz mountain virus<br>(5) | 0             | 0             | 0             | 5<br>(100%)   | 0 | 0 | 0             |
| SCWL (1)                   | 0             | 1<br>(100%)   | 0             | 0             | 0 | 0 | 0             |

**Table S8.** Conserved regions in 3' UTR of the KITV Segment 2.

| Name of the virus<br>(number of strains) | Motifs<br>1, 2, 3, 4, 5 | Motifs<br>1, 2, 3, 5 | Motifs<br>1, 2, 3  | Motif<br>1    | Motifs<br>1, 4 | Motif<br>4    | Motifs<br>2, 3 | Motifs<br>1, 3 | Motif<br>2   | Motifs<br>characteristic<br>of KITV<br>were not<br>found |
|------------------------------------------|-------------------------|----------------------|--------------------|---------------|----------------|---------------|----------------|----------------|--------------|----------------------------------------------------------|
| KITV (18)                                | 18<br>(100%)            | 0                    | 0                  | 0             | 0              | 0             | 0              | 0              | 0            | 0                                                        |
| JMTV<br>(82)                             | 44<br>(53,66%)          | 2<br>(2,44%)         | 14<br>(17,07<br>%) | 0             | 0              | 0             | 8<br>(9,76%)   | 1<br>(1,22%)   | 4<br>(4,88%) | 9<br>(10,98%)                                            |
| MGTV<br>(3)                              | 1<br>(33,33%)           | 2<br>(66,67%)        | 0                  | 0             | 0              | 0             | 0              | 0              | 0            | 0                                                        |
| Alongshan<br>virus (9)                   | 0                       | 0                    | 0                  | 5<br>(55,56%) | 1<br>(11,11%)  | 0             | 0              | 0              | 0            | 3<br>(33,33%)                                            |
| Yanggou<br>virus (3)                     | 0                       | 0                    | 0                  | 0             | 0              | 1<br>(33,33%) | 0              | 0              | 0            | 2<br>(66,67%)                                            |
| Sichuan<br>tick virus<br>(3)             | 1<br>(33,33%)           | 1<br>(33,33%)        | 1<br>(33,33%)      | 0             | 0              | 0             | 0              | 0              | 0            | 0                                                        |
| Harz<br>mountain<br>virus (5)            | 0                       | 0                    | 0                  | 0             | 5<br>(100%)    | 0             | 0              | 0              | 0            | 0                                                        |
| SCWL (1)                                 | 0                       | 0                    | 1<br>(100%)        | 0             | 0              | 0             | 0              | 0              | 0            | 0                                                        |



**Table S9.** Conserved regions in 5' UTR of the KITV Segment 3.

| Name of the virus (number of strains) | Motifs<br>1, 2 | Motif<br>1   | Motif<br>2     | Motifs characteristic of<br>KITV were not found |
|---------------------------------------|----------------|--------------|----------------|-------------------------------------------------|
| KITV (18)                             | 18<br>(100%)   | 0            | 0              | 0                                               |
| JMTV (74)                             | 42<br>(56,76%) | 2<br>(2,70%) | 18<br>(24,32%) | 12<br>(16,22%)                                  |
| MGTV (3)                              | 3<br>(100%)    | 0            | 0              | 0                                               |
| Alongshan virus (8)                   | 0              | 0            | 0              | 8<br>(100%)                                     |
| Yanggou virus (3)                     | 0              | 0            | 0              | 3<br>(100%)                                     |
| Sichuan tick virus (3)                | 3<br>(100%)    | 0            | 0              | 0                                               |
| Harz mountain virus (7)               | 0              | 0            | 0              | 7<br>(100%)                                     |
| SCWL (1)                              | 1<br>(100%)    | 0            | 0              | 0                                               |

**Table S10.** Conserved regions in 5' UTR of the KITV Segment 4.

| Name of the virus<br>(number of strains) | Motifs<br>1, 2, 3 | Motifs<br>2, 3 | Motifs<br>1, 2 | Motif<br>1   | Motif<br>2   | Motif<br>3    | Motifs<br>characteristic of<br>KITV were not<br>found |
|------------------------------------------|-------------------|----------------|----------------|--------------|--------------|---------------|-------------------------------------------------------|
| KITV (18)                                | 18<br>(100%)      | 0              | 0              | 0            | 0            | 0             | 0                                                     |
| JMTV (71)                                | 42<br>(59,15%)    | 1<br>(1,41%)   | 14<br>(19,72%) | 2<br>(2,82%) | 5<br>(7,04%) | 3<br>(4,23%)  | 4<br>(5,63%)                                          |
| MGTV (3)                                 | 3<br>(100%)       | 0              | 0              | 0            | 0            | 0             | 0                                                     |
| Alongshan virus (8)                      | 0                 | 0              | 0              | 0            | 0            | 8<br>(100%)   | 0                                                     |
| Yanggou virus (3)                        | 0                 | 0              | 0              | 0            | 0            | 1<br>(33,33%) | 2<br>(66,67%)                                         |
| Sichuan tick virus (3)                   | 3<br>(100%)       | 0              | 0              | 0            | 0            | 0             | 0                                                     |
| Harz mountain virus<br>(7)               | 0                 | 0              | 0              | 0            | 0            | 7<br>(100%)   | 0                                                     |
| SCWL (1)                                 | 1<br>(100%)       | 0              | 0              | 0            | 0            | 0             | 0                                                     |

**Table S11.** Conserved regions in 3' UTR of the KITV Segment 4.

| Name of the virus<br>(number of strains) | Motifs<br>1, 2, 3, 4, 5, 6 | Motifs<br>1, 2, 3, 5, 6 | Motifs<br>1, 2, 5, 6 | Motifs<br>2, 5, 6 | Motifs<br>1, 4 | Motif 5      | Motifs<br>1, 4, 6 | Motif 1     | Motifs<br>characteristic of<br>KITV<br>were not<br>found |
|------------------------------------------|----------------------------|-------------------------|----------------------|-------------------|----------------|--------------|-------------------|-------------|----------------------------------------------------------|
| KITV (18)                                | 18<br>(100%)               | 0                       | 0                    | 0                 | 0              | 0            | 0                 | 0           | 0                                                        |
| JMTV (93)                                | 51<br>(54,84%)             | 10<br>(10,75%)          | 24<br>(25,81%)       | 3<br>(3,23%)      | 1<br>(1,08%)   | 3<br>(3,23%) | 0                 | 0           | 1<br>(1,08%)                                             |
| MGTV (3)                                 | 3<br>(100%)                | 0                       | 0                    | 0                 | 0              | 0            | 0                 | 0           | 0                                                        |
| Alongshan virus (8)                      | 0                          | 0                       | 0                    | 0                 | 1<br>(12,5%)   | 0            | 7<br>(87,5%)      | 0           | 0                                                        |
| Yanggou virus (3)                        | 0                          | 0                       | 0                    | 0                 | 0              | 0            | 0                 | 3<br>(100%) | 0                                                        |
| Sichuan tick virus (3)                   | 3<br>(100%)                | 0                       | 0                    | 0                 | 0              | 0            | 0                 | 0           | 0                                                        |
| Harz mountain virus (7)                  | 0                          | 0                       | 0                    | 0                 | 7<br>(100%)    | 0            | 0                 | 0           | 0                                                        |
| SCWL (1)                                 | 1<br>(100%)                | 0                       | 0                    | 0                 | 0              | 0            | 0                 | 0           | 0                                                        |

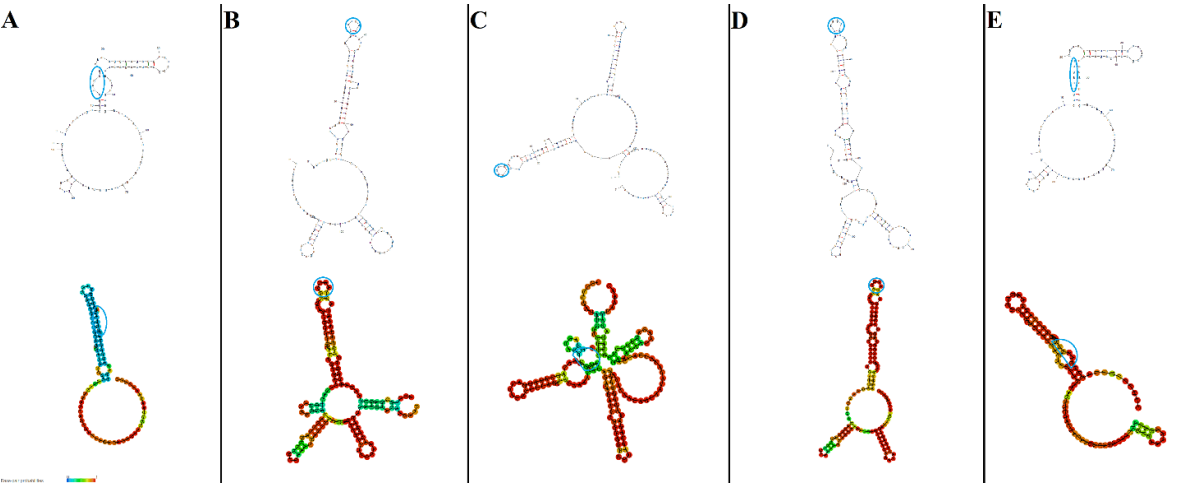

**Figure S1.** Models of secondary structures of the 5' UTR of the first segment of viruses (A) MGTV, (B) ALSV, (C) YGTV, (D) HMTV, (E) JMTV. The area of the highly conservative sequence 5'-CAAGUG-3' is marked in blue. The models from the top were obtained in the UNA MFOLD 3.6 program, from the bottom in the Vienna RNA Fold program.

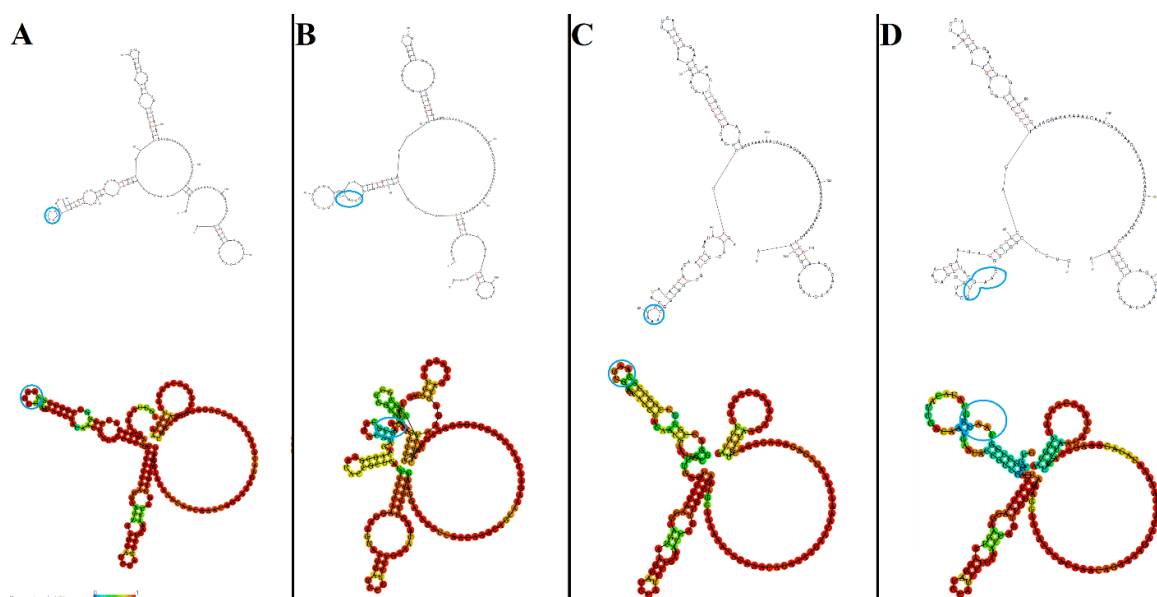

**Figure S2.** Models of secondary structures of the 5' UTR of the second segment of viruses (A) MGTV, (B) JMTV, (C) SCWLT, (D) STV. The area of the highly conservative sequence 5'-CAAGUG-3' is marked in blue. The models from the top were obtained in the UNA MFOLD 3.6 program, from the bottom in the Vienna RNA Fold program.

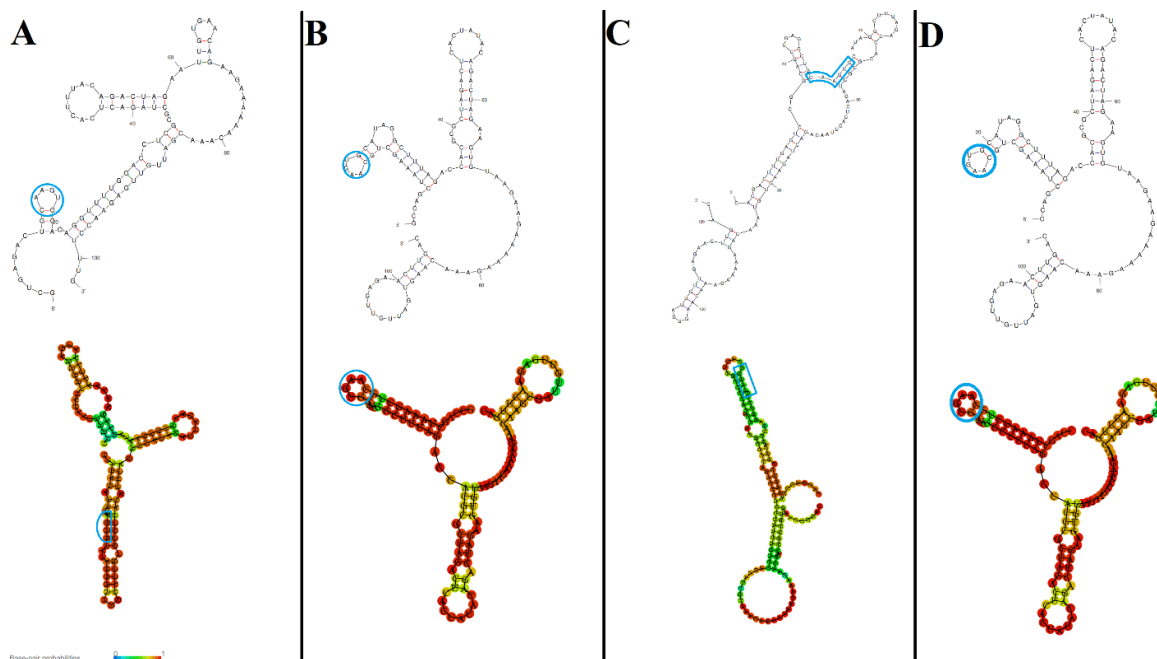

**Figure S3.** Models of secondary structures of the 5' UTR of the third segment of viruses (A) MGTV, (B) STV, (C) JMTV, (D) SCWLT. The area of the highly conservative sequence 5'-CAAGUG-3' is marked in blue. The models from the top were obtained in the UNA MFOLD 3.6 program, from the bottom in the Vienna RNA Fold program.

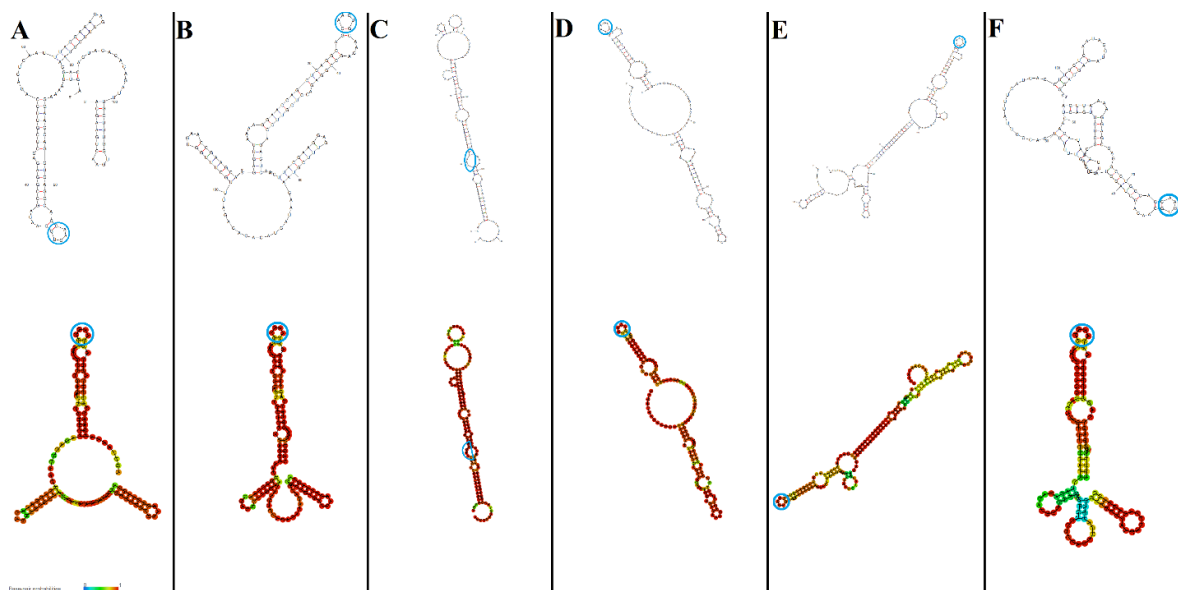

**Figure S4.** Models of secondary structures of the 5' UTR of the fourth segment of viruses (A) ALSV, (B) HMTV, (C) SCWLV, (D) STV, (E) JMTV, (F) YGTV. The area of the highly conservative sequence 5'-CAAGUG-3' is marked in blue. The models from the top were obtained in the UNA MFOLD 3.6 program, from the bottom in the Vienna RNA Fold program.

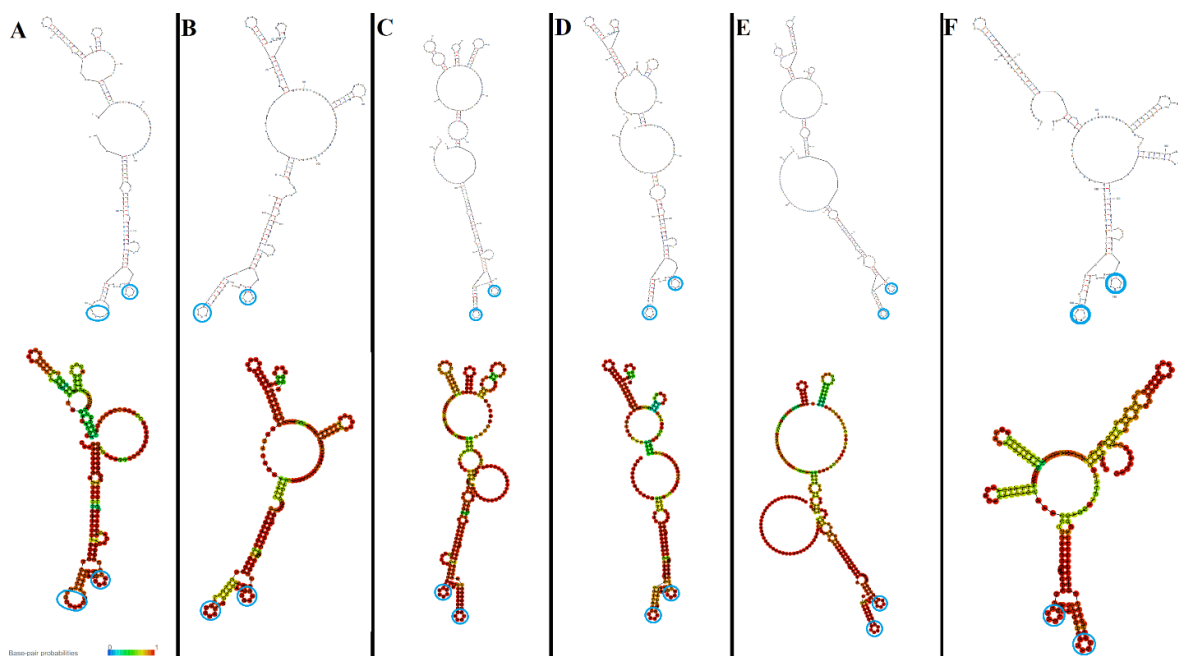

**Figure S5.** Models of secondary structures of the 3' UTR of the first segment of viruses (A) TAKV, (B) ALSV, (C) MGTV, (D) HMTV, (E) JMTV, (F) YGTV. The area of the highly

conservative sequence 5'-CAAGUG-3' is marked in blue. The models from the top were obtained in the UNA MFOLD 3.6 program, from the bottom in the Vienna RNA Fold program.

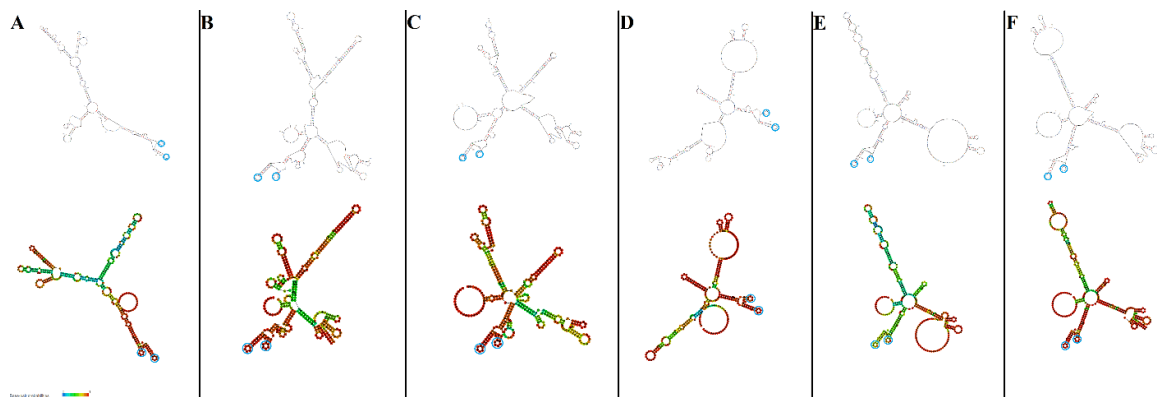

**Figure S6.** Models of secondary structures of the 3' UTR of the second segment of viruses (A) MGTV, (B) HMTV, (C) ALSV, (D) YGTV, (E) STV, (F) JMTV. The area of the highly conservative sequence 5'-CAAGUG-3' is marked in blue. The models from the top were obtained in the UNA MFOLD 3.6 program, from the bottom in the Vienna RNA Fold program.

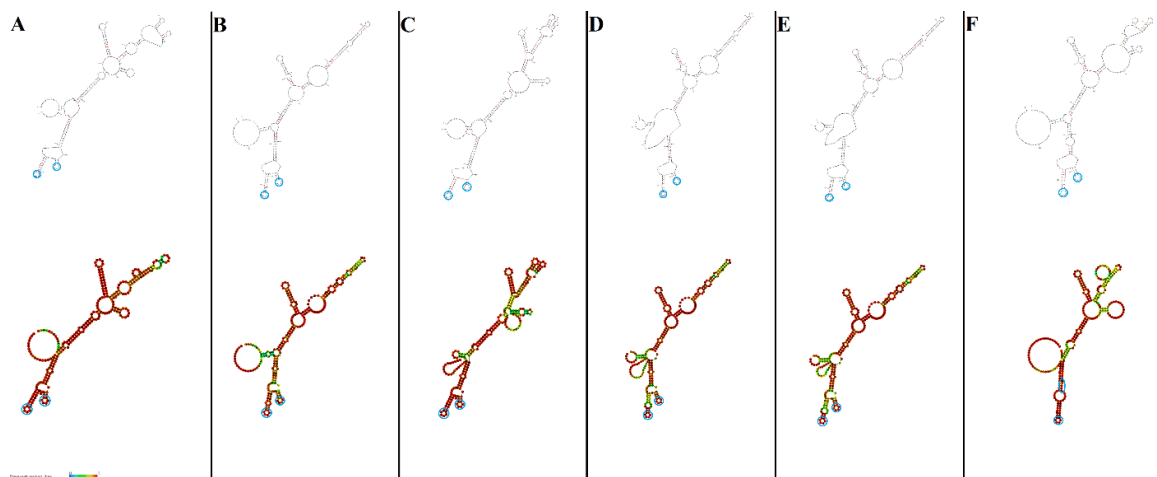

**Figure S7.** Models of secondary structures of the 3' UTR of the fourth segment of viruses (A) ALSV, (B) MGTV, (C) HMTV, (D) SCWLTIV, (E) STV, (F) JMTV. The area of the highly conservative sequence 5'-CAAGUG-3' is marked in blue. The models from the top were obtained in the UNA MFOLD 3.6 program, from the bottom in the Vienna RNA Fold program.

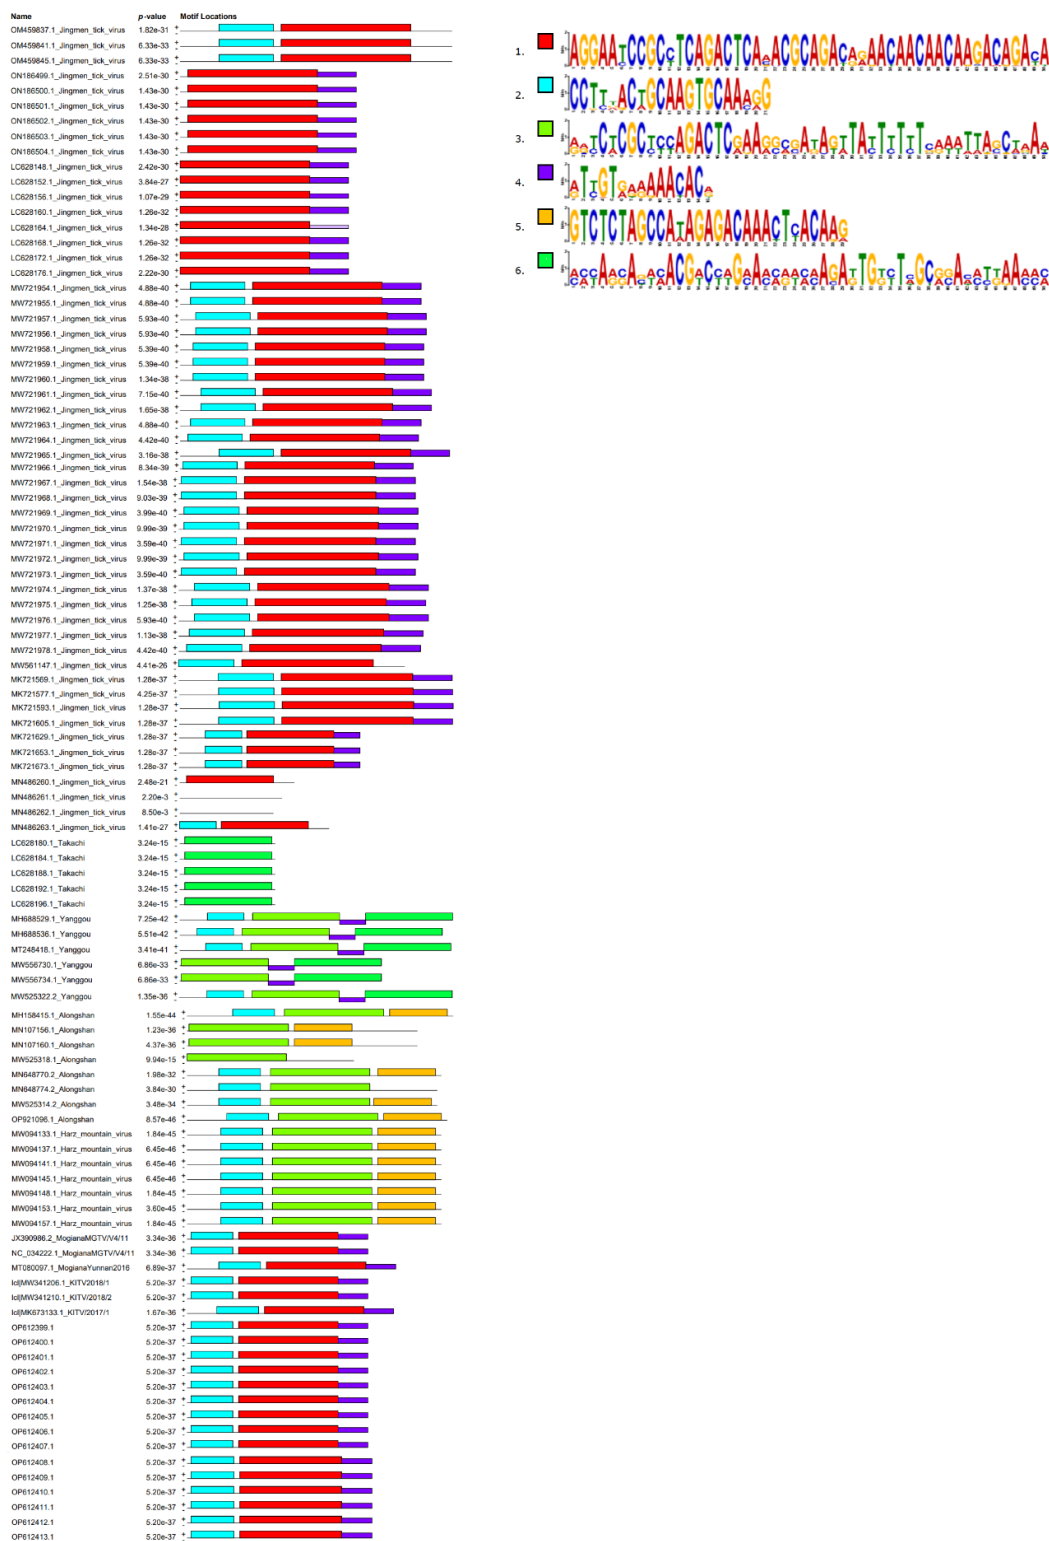

**Figure S8.** Conserved motifs in the 5' UTR of segment 1 of segmented flavi-like viruses.



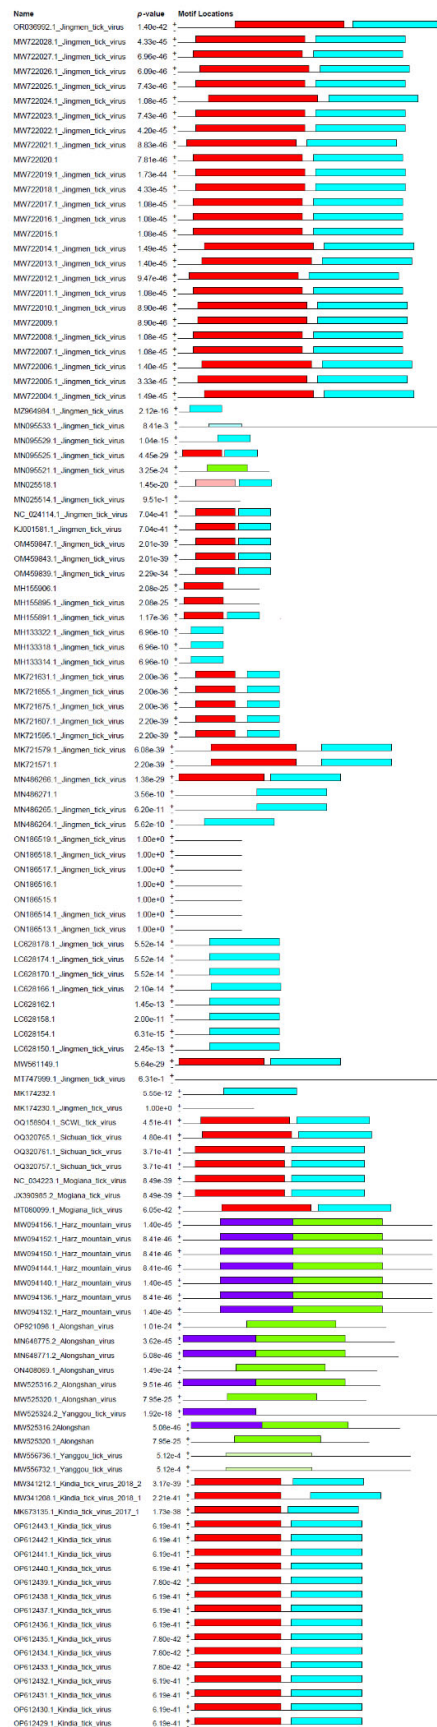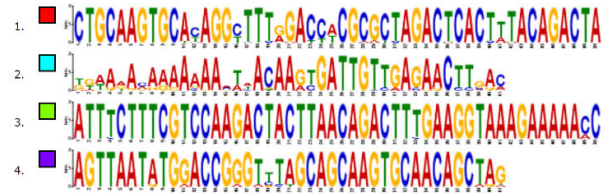

**Figure S10.** Conservative motifs in the 5' UTR of segment 3 of segmented flavi-like viruses.







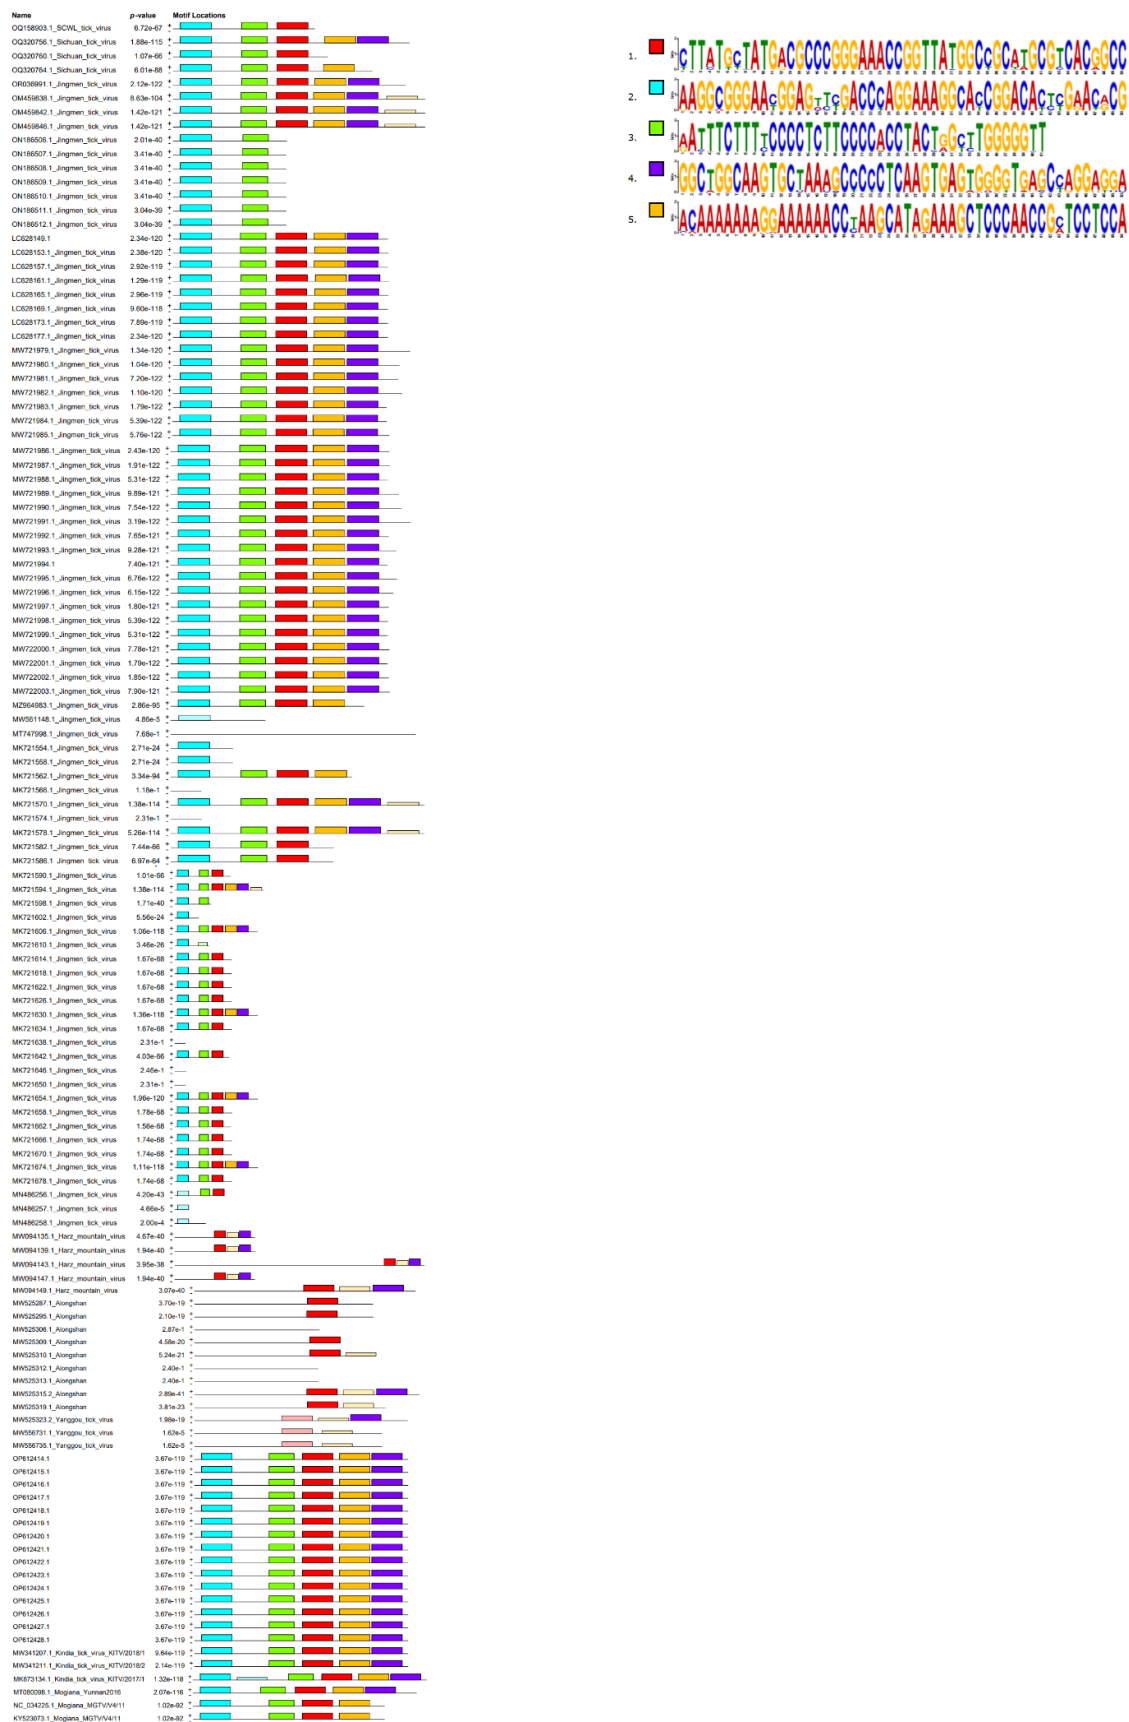

**Figure S13.** Conservative motifs in the 3' UTR of segment 2 of segmented flavi-like viruses.
